# Supplementary material for: Unveiling the impact of the mpg-C 3 N 4 @Pa@Ni nanocomposite in the reduction of nitroaromatic derivatives by comparative solvent-free methods
Source: Royal Society of Chemistry journal article supplement (doi:10.1039/d4ma00785a), 2024-12-04
Supplement: d4ma00785a1.pdf [file d4ma00785a1.pdf]

## Supporting information

### Unveiling the Impact of mpg-C<sub>3</sub>N<sub>4</sub>@Pa@Ni Nanocomposite in the Reduction of Nitroaromatic Derivatives by Comparative Solvent-free Methods

Fatemeh Eshrati <sup>a</sup>, Hossein Ghafuri\*<sup>a</sup>, Peyman Hanifehnejad <sup>a</sup>, Haniyeh Dogari <sup>a</sup>

<sup>a</sup> Catalysts and Organic Synthesis Research Laboratory, Department of Chemistry, Iran University of Science and Technology, 16846-13114 Tehran, Iran

\*E-mail: ghafuri@iust.ac.ir

| Contents                                                                      | Page |
|-------------------------------------------------------------------------------|------|
| 1. FT-IR comparison of recovered nanocomposite and origin one's nanocomposite | S2   |
| 2. EDS recovered nanocomposite                                                | S3   |
| 3. FT-IR spectra of 2-aminobenzophenone                                       | S4   |
| 4. <sup>1</sup> H NMR spectra of 2-aminobenzophenone                          | S4   |
| 5. FT-IR spectra of 4-aminoacetophenone                                       | S5   |
| 6. <sup>1</sup> H NMR spectra of 4-aminoacetophenone                          | S6   |
| 7. FT-IR spectra of 4-bromoaniline                                            | S7   |
| 8. <sup>1</sup> H NMR spectra of 4-bromoaniline                               | S8   |

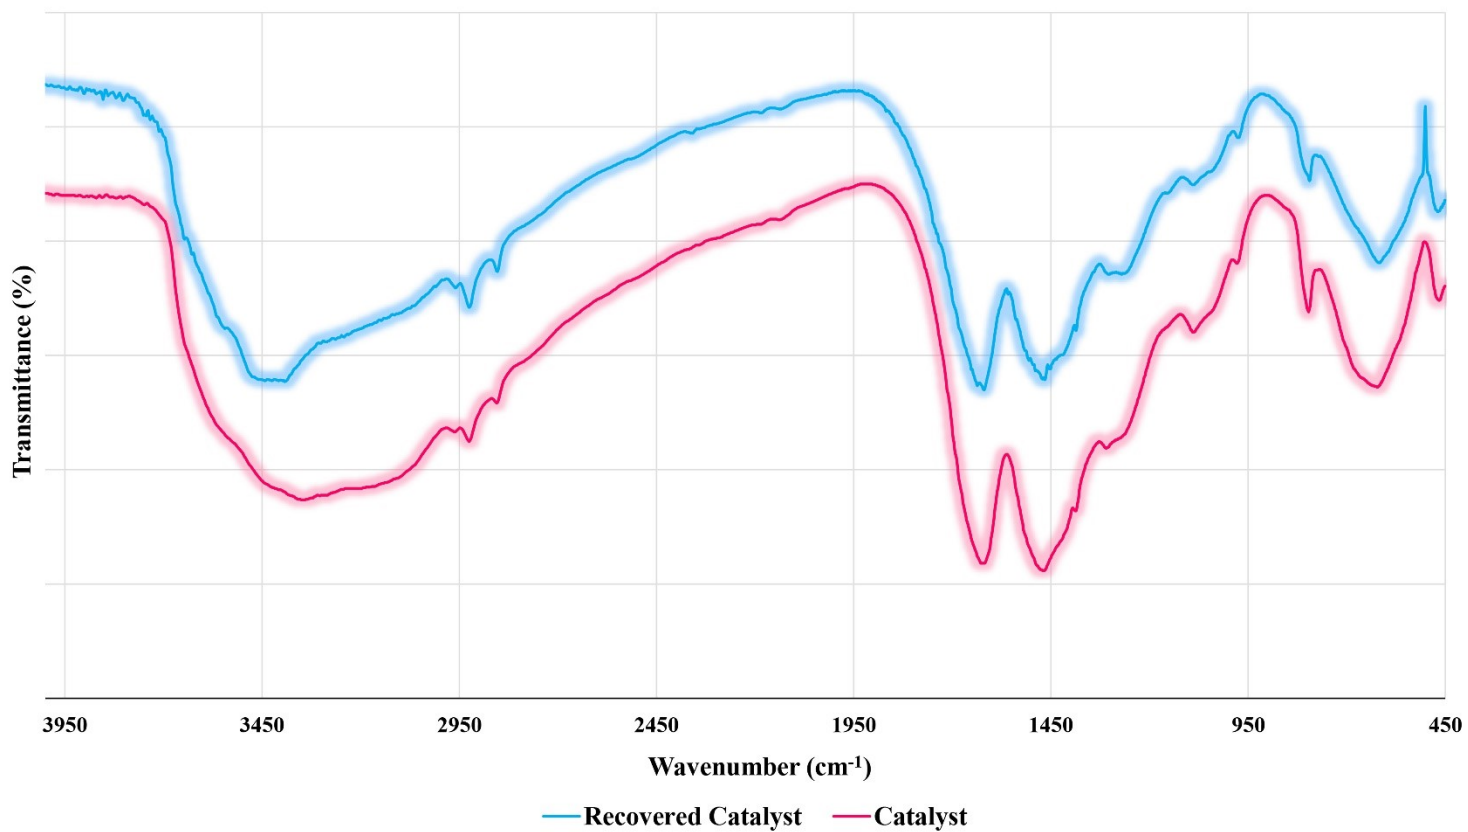

**Figure S1.** FT-IR comparison of recovered nanocomposite and origin one's nanocomposite.

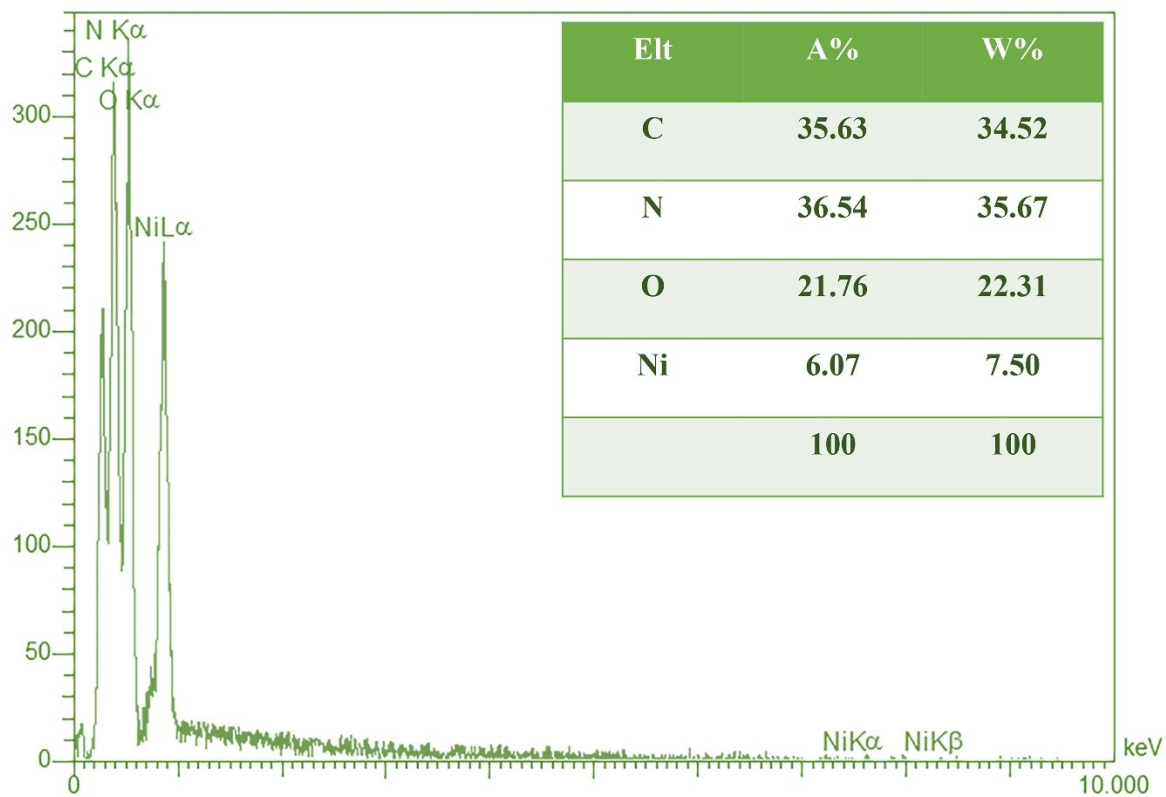

**Figure S2.** EDS recovered nanocomposite.

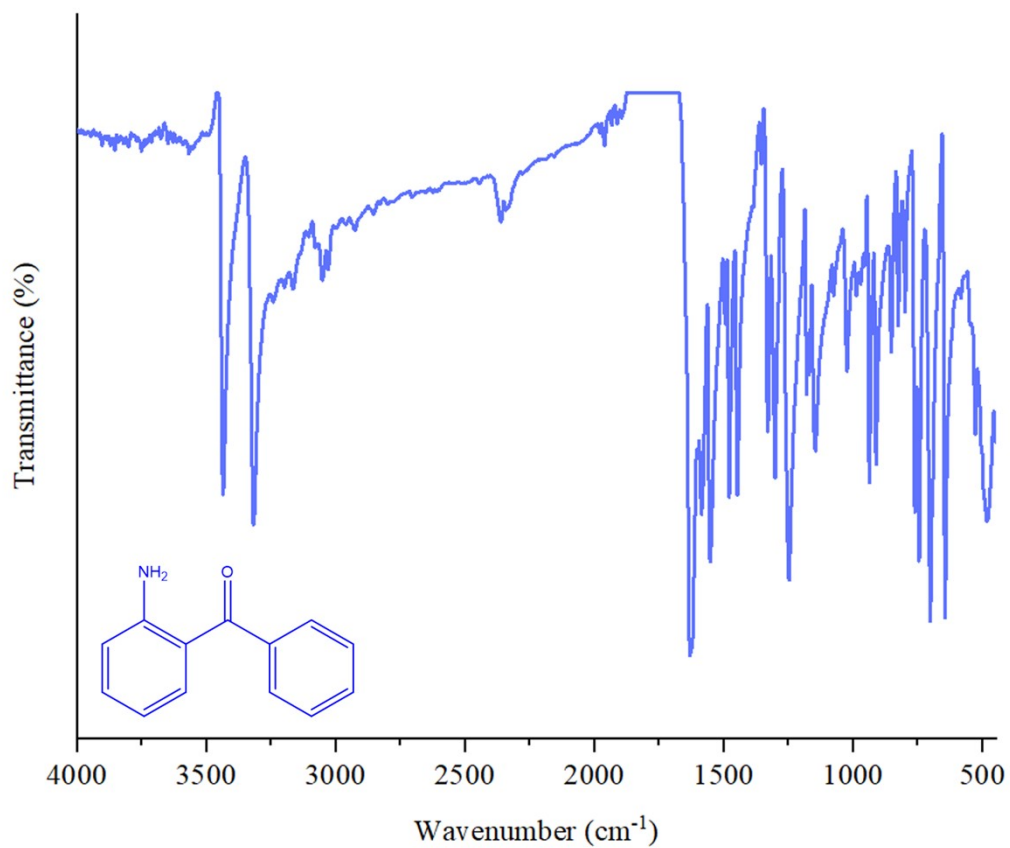

**Figure S3.** FT-IR spectra of 2-aminobenzophenone.

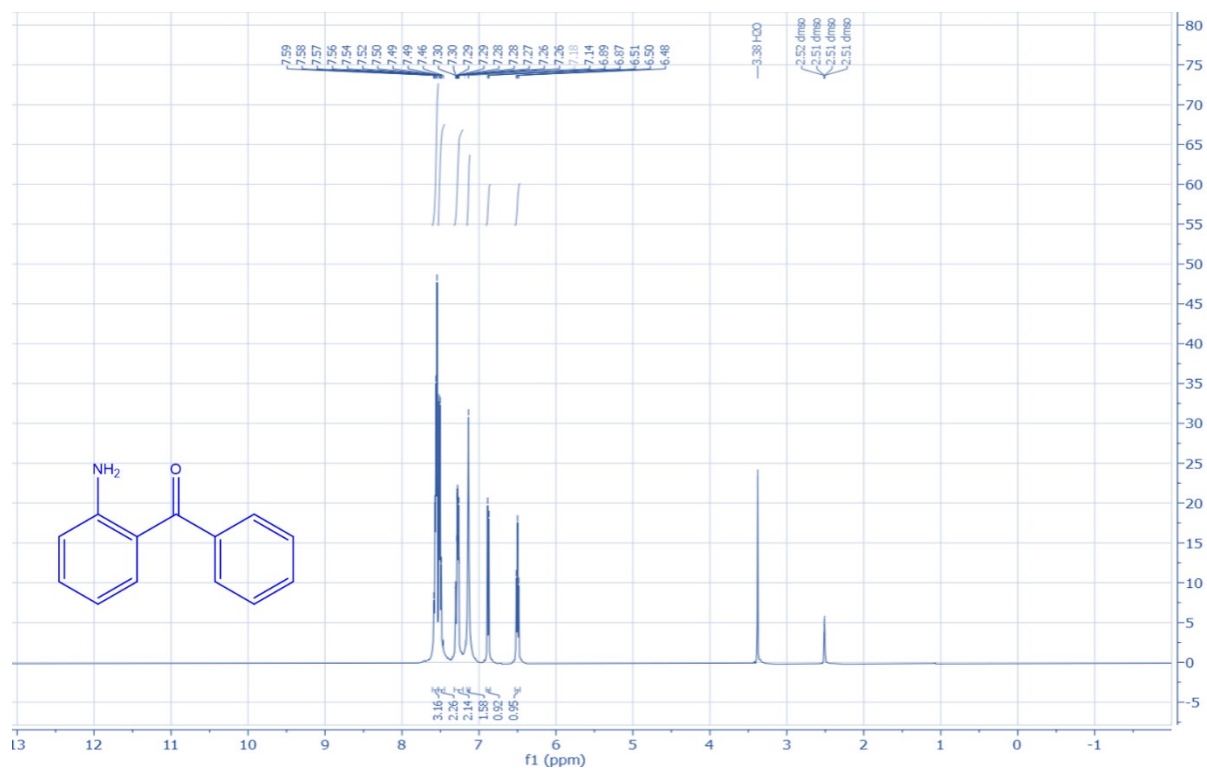

**Figure S4.**  $^1\text{H}$  NMR spectra of 2-aminobenzophenone.  $^1\text{H}$  NMR spectra of 2-aminobenzophenone.

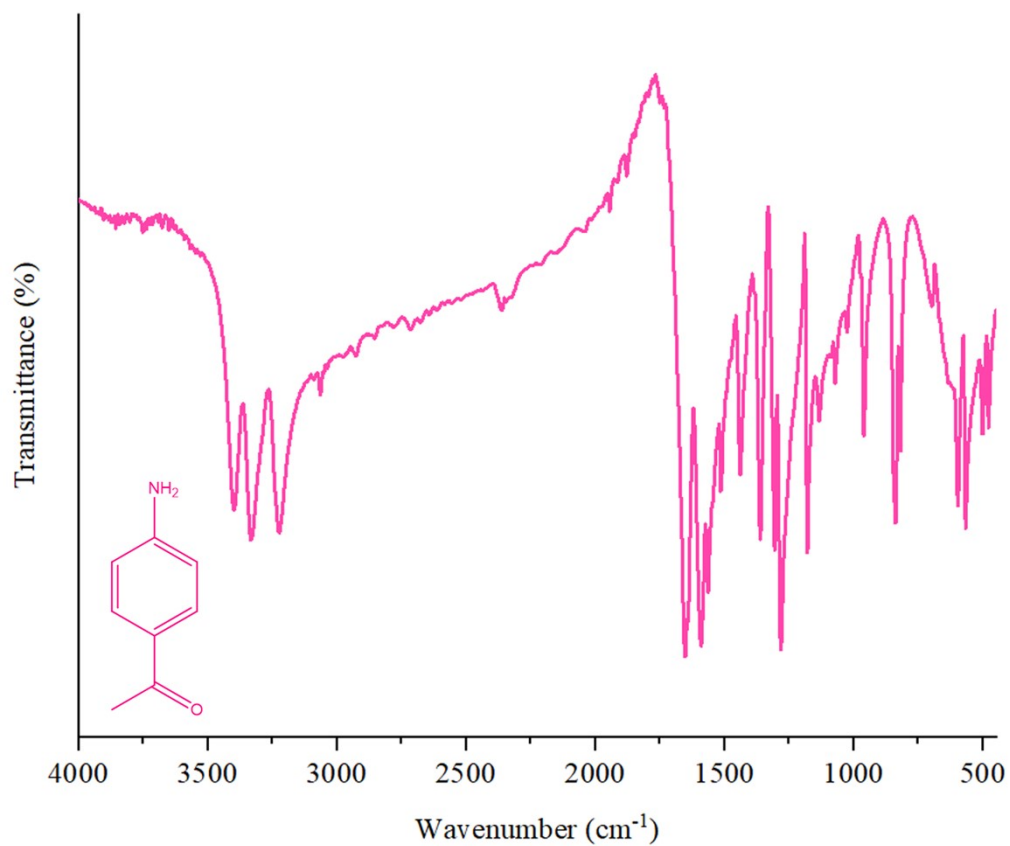

**Figure S5.** FT-IR spectra of 4-aminoacetophenone.

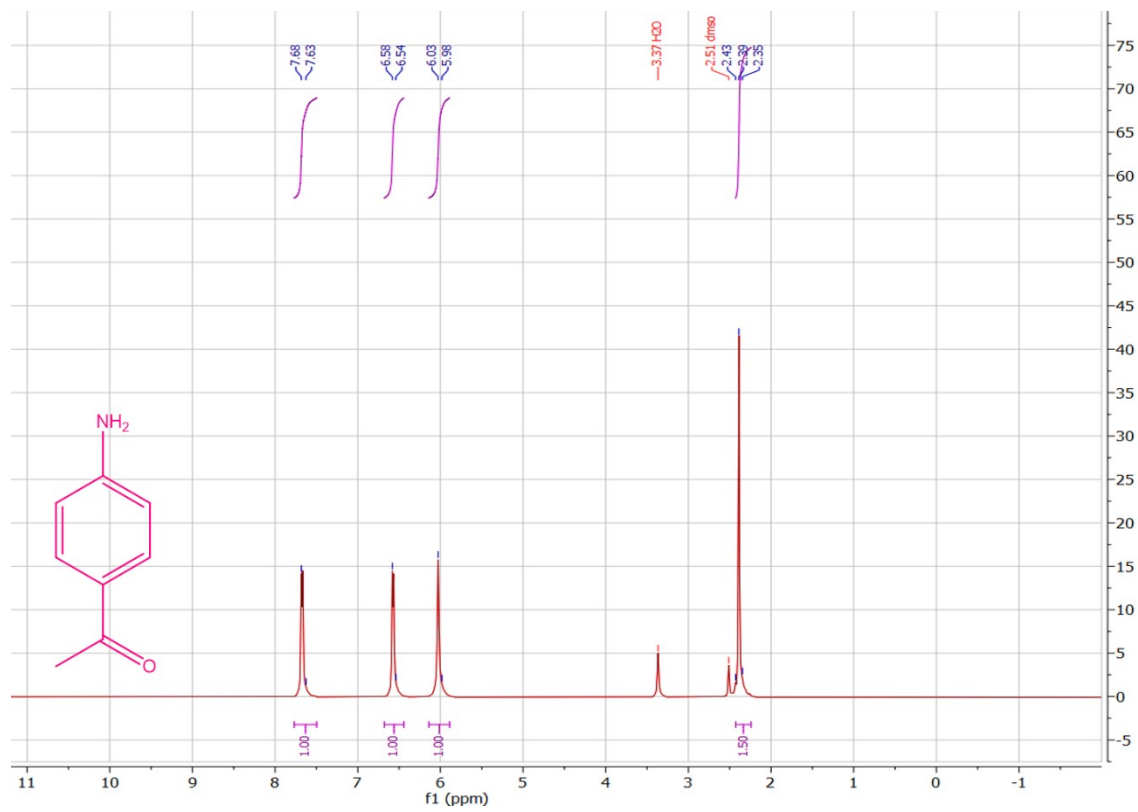

**Figure S6.**  $^1\text{H}$  NMR spectra of 4-aminoacetophenone.

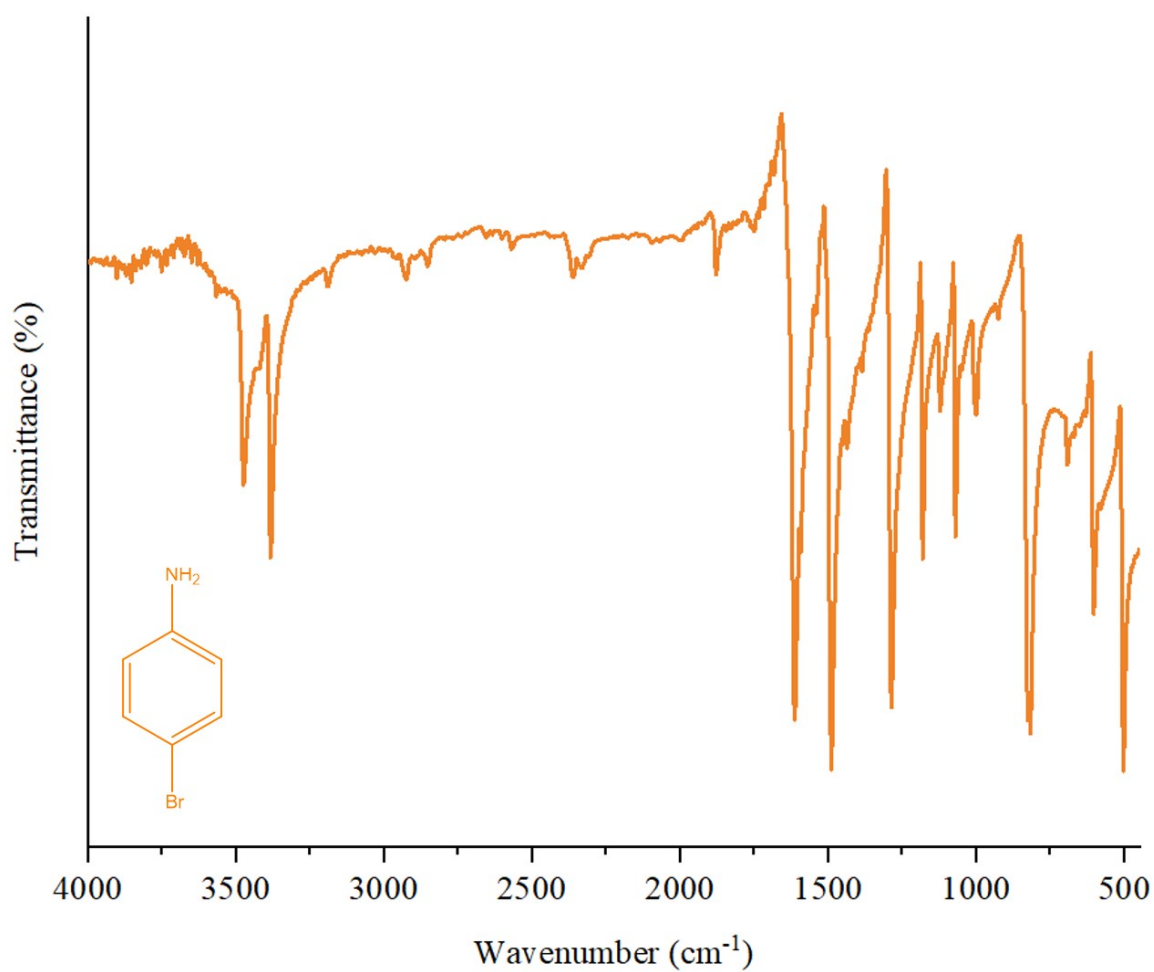

**Figure S7.** FT-IR spectra of 4-bromoaniline.

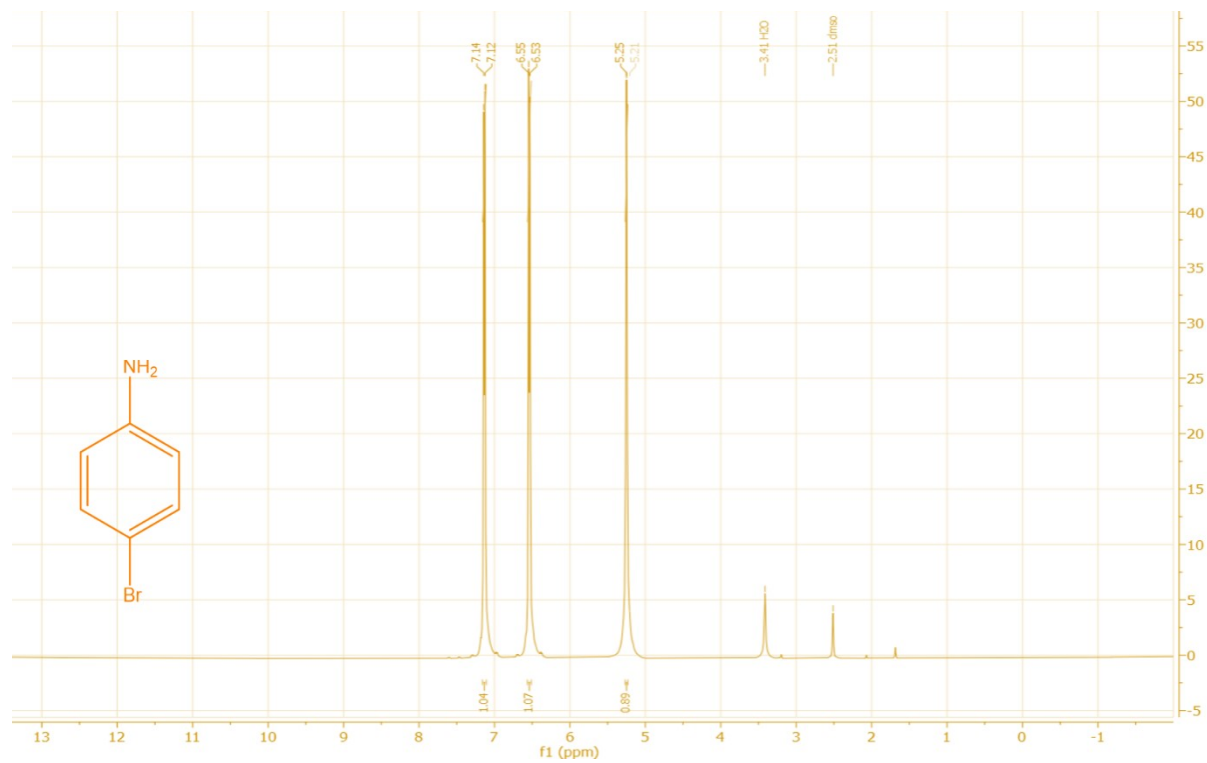

**Figure S8.** <sup>1</sup>H NMR spectra of 4-bromoaniline.
